# Supplementary material for: Conversion of methanol to hydrocarbons over H-MCM-22 zeolite: deactivation behaviours related to acid density and distribution
Source: Royal Society of Chemistry journal article supplement (doi:10.1039/d2cy01270g), 2022-01-01
Supplement: d2cy01270g1.pdf [file d2cy01270g1.pdf]

## Supporting Information

### Conversion of Methanol to Hydrocarbons over H-MCM-22 Zeolite: Deactivation Behaviours related to Acid Density and Distribution

Tingyu Liang<sup>a</sup>, Jialing Chen<sup>b,\*</sup>, Sen Wang<sup>c</sup>, Pengfei Wang<sup>c</sup>, Zhangfeng Qin<sup>c</sup>, Fang Jin<sup>a</sup>, Mei Dong<sup>c</sup>, Jianguo Wang<sup>c</sup>, Weibin Fan<sup>c</sup>

<sup>a</sup> *Key Laboratory for Green Chemical Process of Ministry of Education, and Hubei Key Laboratory of Novel Reactor & Green Chemical Technology, School of Chemical Engineering & Pharmacy, Wuhan Institute of Technology, Wuhan 430205, China*

<sup>b</sup> *Key Laboratory of Hubei Province for Coal Conversion and New Carbon Materials, School of Chemistry and Chemical Engineering, Wuhan University of Science and Technology, Wuhan 430081, China*

<sup>c</sup> *State Key Laboratory of Coal Conversion, Institute of Coal Chemistry, Chinese Academy of Sciences, P.O. Box 165, Taiyuan, Shanxi 030001, PR China*

\* Corresponding authors: Tel.: +86 027 68862335. E-mail addresses: chenjialing@wust.edu.cn.

As the **Supporting Information** of the manuscript “*Conversion of Methanol to Hydrocarbons over H-MCM-22 Zeolite: Deactivation Behaviours related to Acid Density and Distribution*”, following materials are provided:

- (1) The Brønsted and Lewis acid density with different strength in the H-M22-*x* zeolites (Table S1);
- (2) Catalytic performance of the H-M22-*x* zeolites in MTH (Table S2);
- (3) The linear relationship between aluminum concentration from ICP-AES determination and total acid density from quantitative results of NH<sub>3</sub>-TPD profiles in H-M22-*x* zeolites (Figure S1);

- (4) Determination of acid distribution and acid strength for H-M22-*x* zeolites by FT-IR spectra of pyridine adsorption (Py-IR) and 2,6-di-tert-butylpyridine adsorption (DTBPy-IR). (Figure S2);
- (5) Deconvolution of the <sup>27</sup>Al and <sup>29</sup>Si MAS NMR spectra of the H-M22-*x* zeolites (Figure S3–S5);
- (6) P/E ratio and C<sub>4</sub>-HTI as a function of time on stream in MTH over H-M22-*x* zeolites (Figure S6);
- (7) GC-MS total ion chromatograms of carbonaceous species retained in H-M22-*x* zeolites at the time on stream (TOS) of 3 h and 15 h for MTH at 450 °C with a methanol WHSV of 2 h<sup>-1</sup> over H-M22-*x* zeolites (Figure S7);
- (8) UV-vis spectra of completely deactivated H-M22-*x* zeolites (Figure S8).

**Table S1.** The Brønsted and Lewis Acid Density with Different Strength in the H-M22-*x* Zeolites.

| Zeolite  | $B_{\text{ext}}^a$<br>( $\mu\text{mol g}^{-1}$ ) | BAS density $^b$ ( $\mu\text{mol g}^{-1}$ ) |        |        | LAS density $^b$ ( $\mu\text{mol g}^{-1}$ ) |        |        |
|----------|--------------------------------------------------|---------------------------------------------|--------|--------|---------------------------------------------|--------|--------|
|          |                                                  | weak                                        | medium | strong | weak                                        | medium | strong |
| H-M22-15 | 62                                               | 24                                          | 42     | 379    | 99                                          | 27     | 116    |
| H-M22-30 | 45                                               | 25                                          | 36     | 203    | 82                                          | 6      | 68     |
| H-M22-50 | 25                                               | 27                                          | 34     | 130    | 10                                          | 11     | 14     |
| H-M22-70 | 24                                               | 26                                          | 36     | 100    | 12                                          | 4      | 9      |
| H-M22-90 | 12                                               | 26                                          | 34     | 59     | 10                                          | 0      | 0      |

<sup>a</sup> The amount of external Brønsted acid sites was calculated from the DTBPy-IR spectra.

<sup>b</sup> The amount of BAS and LAS with different acid strength was estimated from the quantities of Brønsted acid sites (BAS) and Lewis acid sites (LAS) determined by Py-IR at different temperatures; the differences in BAS (or LAS) between 150 and 250 °C, between 250 and 350 °C, and remained BAS (or LAS) at 350 °C correspond to weak, medium, and strong acid sites, respectively.

**Table S2.** Catalytic Performance of the H-MCM-22 Zeolites with Different Si/Al Ratios in MTH. <sup>a</sup>

| Zeolite  | Methanol conversion<br><sup>b</sup> (%) | Product distribution <sup>b</sup> (%) |                             |                             |                             |                             |           |        | P/E <sup>c</sup> | C <sub>4</sub> -HTI<br><sup>d</sup> | Lifetime<br><sup>e</sup> (h) |
|----------|-----------------------------------------|---------------------------------------|-----------------------------|-----------------------------|-----------------------------|-----------------------------|-----------|--------|------------------|-------------------------------------|------------------------------|
|          |                                         | C <sub>1-5</sub> <sup>0</sup>         | C <sub>2</sub> <sup>=</sup> | C <sub>3</sub> <sup>=</sup> | C <sub>4</sub> <sup>=</sup> | C <sub>5</sub> <sup>=</sup> | aromatics | others |                  |                                     |                              |
| H-M22-15 | 99.9                                    | 21.6                                  | 9.8                         | 26.9                        | 12.1                        | 3.6                         | 20.7      | 5.3    | 2.7              | 0.33                                | 36                           |
| H-M22-30 | 99.8                                    | 9.5                                   | 5.1                         | 42.4                        | 18.5                        | 10.7                        | 8.5       | 5.3    | 8.3              | 0.12                                | 60                           |
| H-M22-50 | 99.8                                    | 5.7                                   | 3.5                         | 47.4                        | 19.8                        | 14.2                        | 3.9       | 5.5    | 13.5             | 0.07                                | 49                           |
| H-M22-70 | 99.8                                    | 4.4                                   | 3.2                         | 48.2                        | 20.3                        | 16.4                        | 2.4       | 5.1    | 15.1             | 0.05                                | 39                           |
| H-M22-90 | 99.3                                    | 5.1                                   | 2.9                         | 45.6                        | 20.1                        | 17.3                        | 1.4       | 7.6    | 15.7             | 0.04                                | 14                           |

<sup>a</sup> The MTH reaction was carried out at 450 °C at atmosphere pressure with a methanol WHSV of 2 h<sup>-1</sup>; the feed was diluted by 66.7 vol.% nitrogen.

<sup>b</sup> The methanol conversion and product distribution (selectivity to products) are provided at the half lifetime and calculated on the basis of carbon atoms; C<sub>1-5</sub><sup>0</sup> represents alkanes with 1–5 carbon atoms, whereas C<sub>2</sub><sup>=</sup>–C<sub>5</sub><sup>=</sup> represent ethene to pentenes.

<sup>c</sup> P/E is the selectivity ratio of propene to ethene.

<sup>d</sup> C<sub>4</sub>-HTI represents the hydrogen transfer index, which is calculated from the selectivity to butane (C<sub>4</sub><sup>0</sup>) and butene (C<sub>4</sub><sup>=</sup>) by  $n(C_4^0)/(n(C_4^0) + n(C_4^=))$  in the products.

<sup>e</sup> Catalytic lifetime is defined as the time on stream when the conversion of methanol drops to 90%.

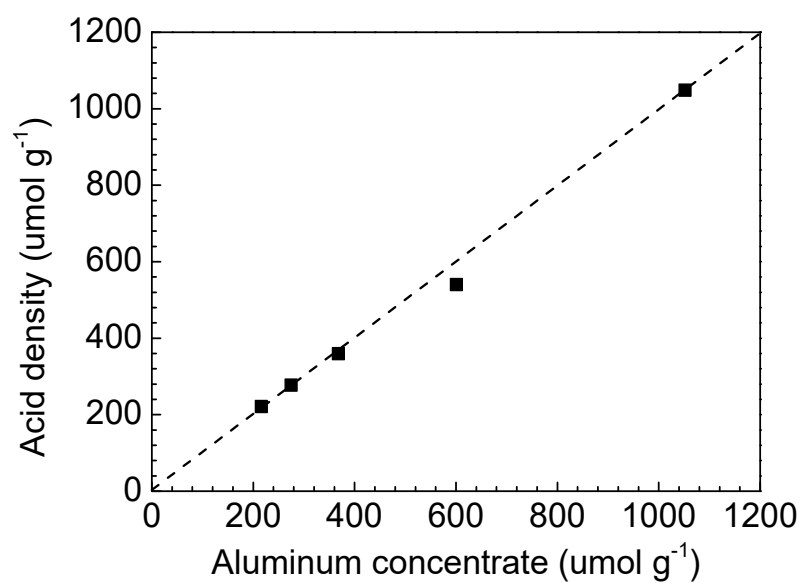

**Figure S1.** The linear relationship between aluminum concentration determination by ICP-AES and total acid density measured by NH<sub>3</sub>-TPD experiments in H-M22-*x* zeolites.

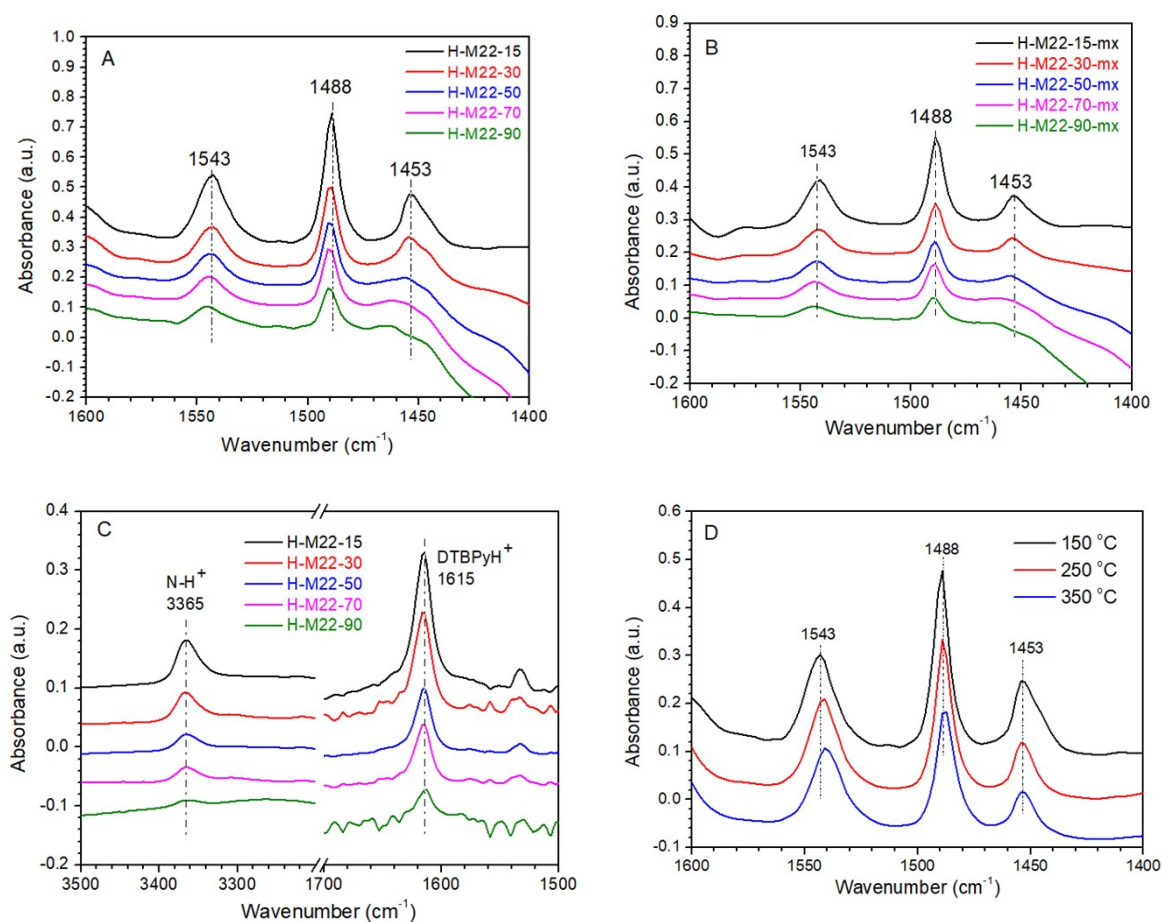

**Figure S2** Determination of acid distribution and acid strength by FT-IR spectra of pyridine adsorption (Py-IR) and 2,6-di-tert-butylpyridine adsorption (DTBPy-IR). The Py-IR spectra determined at 150 °C of (A) H-M22-x zeolites; (B) H-M22-x-mx zeolites; (C) the DTBPy-IR spectra determined at 150 °C of H-M22-x zeolites; (D) the Py-IR spectra of H-M22-15 zeolite determined at 150, 250 and 350 °C.

The Pyridine adsorption bands in Py-IR spectra at 1543  $\text{cm}^{-1}$  and 1453  $\text{cm}^{-1}$  are attributed to pyridinium ions ( $\text{PyH}^+$ ) formed by pyridine adsorbed on Brønsted acid sites, and to pyridine coordinated to Lewis acid sites ( $\text{PyL}$ ), respectively. The bands at 1488  $\text{cm}^{-1}$  are contributed by both  $\text{PyH}^+$  and  $\text{PyL}$ . The bands at 1543  $\text{cm}^{-1}$  and 1453  $\text{cm}^{-1}$  are used to estimate the densities of Brønsted acid sites (BAS) and Lewis acid sites (LAS), respectively, according to Madeira et al<sup>1</sup>.

The total Brønsted acid sites ( $B_{\text{total}}$ ) and total Lewis acid sites ( $L_{\text{total}}$ ) in H-M22-x zeolites are

<sup>1</sup> F. Ferreira Madeira, K. Ben Tayeb, L. Pinard, H. Vezin, S. Maury and N. Cadran, *Appl. Catal. A: General*, 2012, **443–444**, 171–180.

calculated based on the Py-IR spectra determined at 150 °C of H-M22-x zeolites (Figure S2 A). The Py-IR spectra determined at 150 °C of H-M22-x-mx zeolites (Figure S2 B) are used to calculate the residual Brønsted acid sites after selectively poisoning the supercages in zeolite. Thus, the Brønsted acid sites in the supercages ( $B_{\text{sup}}$ ) of H-M22-x zeolites can be estimated by the differences the quantitative results of Figure S2 A and Figure S2 B.

As shown in Figure S2 C, the adsorption bands at 3365  $\text{cm}^{-1}$  and 1615  $\text{cm}^{-1}$  in DTBPy-IR spectra of H-M22-x zeolites can be attributed to N-H stretching vibration and ring vibration mode in DTBPyH<sup>+</sup>, which are characteristic of 2,6-di-tert-butylpyridine adsorption on Bronsted acid sites<sup>2</sup>. The Brønsted acid sites in the external pocket of H-M22-x zeolites ( $B_{\text{poc}}$ ) are estimated from the adsorption band at 1615  $\text{cm}^{-1}$  of the DTBPy-IR spectra determined at 150 °C, according to the Corma<sup>3</sup>, Góra-Marek<sup>4</sup> and co-workers. Therefore, the density of BAS in the sinusoidal channels of H-M22-x zeolites can be calculated by the equation:  $B_{\text{sin}} = B_{\text{total}} - B_{\text{sup}} - B_{\text{poc}}$ .

The acid strength of H-M22-x zeolites are calculated based on the Py-IR spectra determined at different desorption temperatures; for example, the Py-IR spectra of H-M22-15 determined at 150, 250 and 350 °C are given in Figure S2D. The strong BAS and LAS were calculated from the Py-IR spectra recorded at 350 °C. The medium BAS and LAS were estimated from the difference of Py-IR spectra recorded at 350 °C and that of 250 °C. The weak BAS and LAS were estimated from the difference of Py-IR spectra recorded at 250 °C and that of 150 °C.

---

<sup>2</sup> K. Góra-Marek, K. Tarach and M. Choi, *J. Phys. Chem. C*, 2014, 118, 12266–12274.

<sup>3</sup> A. Corma, U. Diaz, V. Fornés, J. M. Guil, J. Martínez-Triguero and E. J. Creighton, *J. Catal.*, 2000, 191, 218–224.

<sup>4</sup> K. Góra-Marek, K. Tarach and M. Choi, *J. Phys. Chem. C*, 2014, 118, 12266–12274.

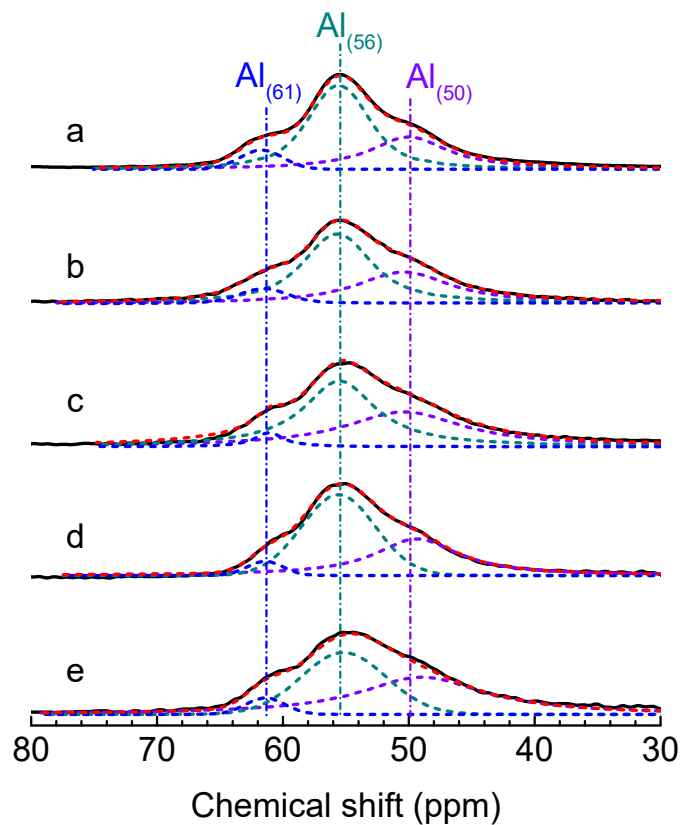

**Figure S3.** Deconvolution of the  $^{27}\text{Al}$  MAS NMR spectra (the number of scans used was 10000) of the H-MCM-22 zeolites with different Si/Al ratios: (a) H-M22-15; (b) H-M22-30; (c) H-M22-50; (d) H-M22-70 and (e) H-M22-90. The black lines are experimental spectra.



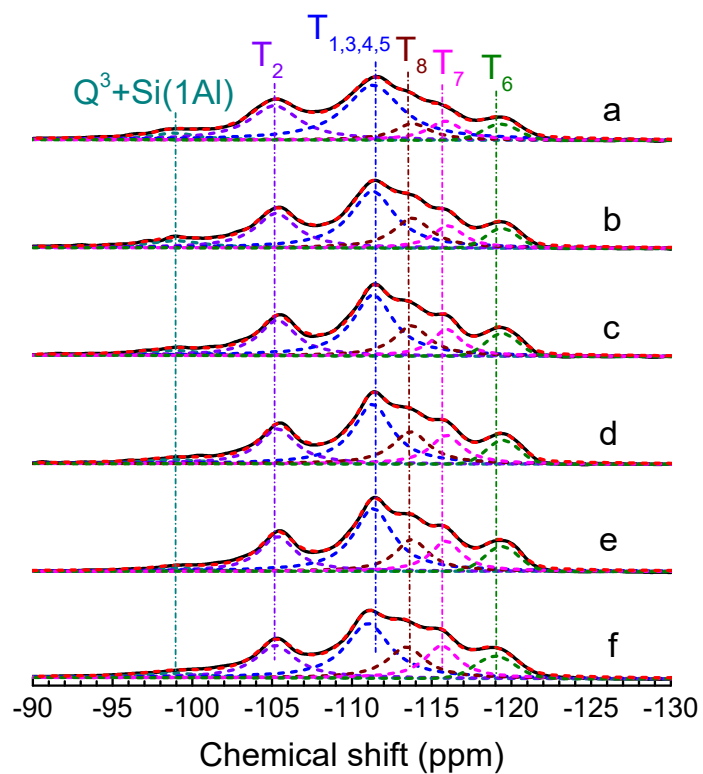

**Figure S4.** Deconvolution of the  $^{29}\text{Si}$  MAS NMR spectra (the number of scans used was 960) the H-MCM-22 zeolites with different Si/Al ratios: (a) H-M22-15; (b) H-M22-30; (c) H-M22-50; (d) H-M22-70 and (e) H-M22-90, and aluminum-free borosilicate (f) H-B-MWW. The black lines are experimental spectra.

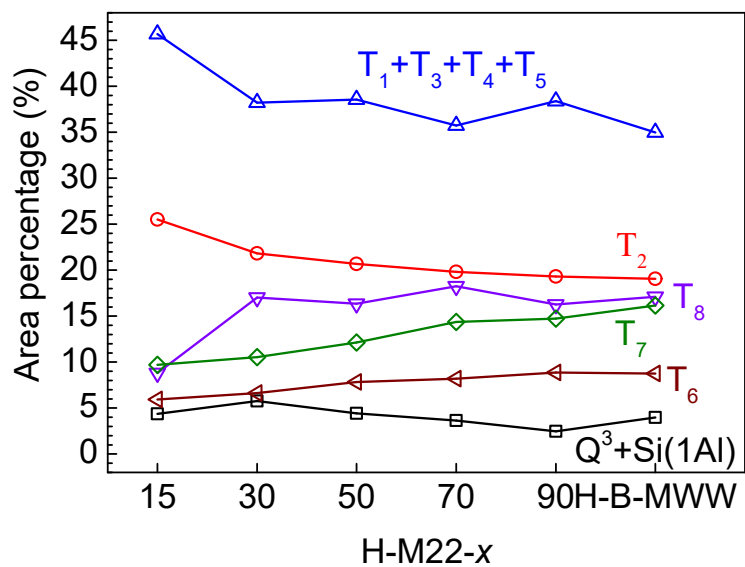

**Figure S5.** Area percentages of the fitted peaks obtained from the deconvolution of the <sup>29</sup>Si MAS NMR spectra of the H-M22-*x* zeolites.

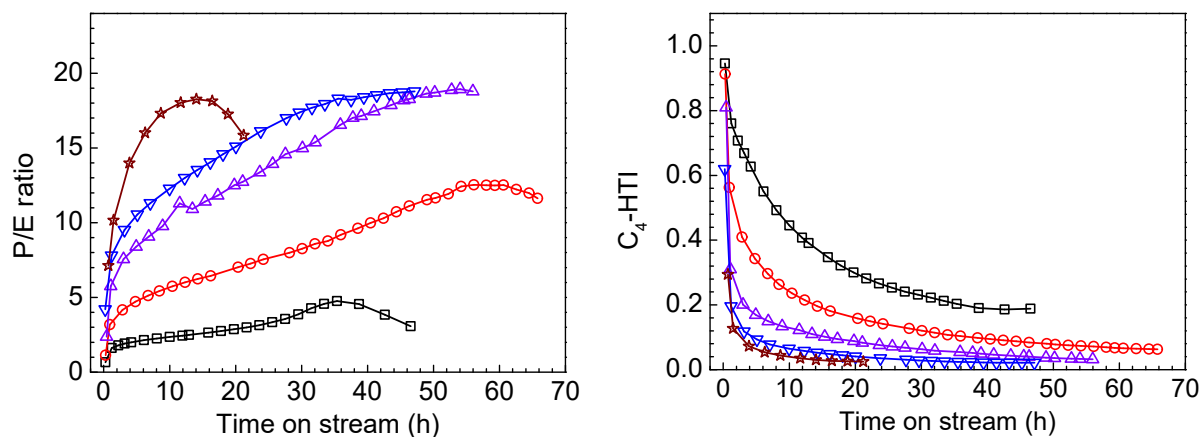

**Figure S6.** P/E ratio and C<sub>4</sub>-HTI value as a function of time on stream in MTH over (□) H-M22-15; (○) H-M22-30; (△) H-M22-50; (▽) H-M22-70 and (☆) H-M22-90 at 450 °C with a methanol WHSV of 2 h<sup>-1</sup>. P/E ratio is the selectivity ratio of propene to ethene, whereas C<sub>4</sub>-HTI value represents the hydrogen transfer index calculated from the selectivity of butane (C<sub>4</sub><sup>0</sup>) and butene (C<sub>4</sub><sup>=</sup>) by  $n(C_4^0)/(n(C_4^0) + n(C_4^=))$  in the products.

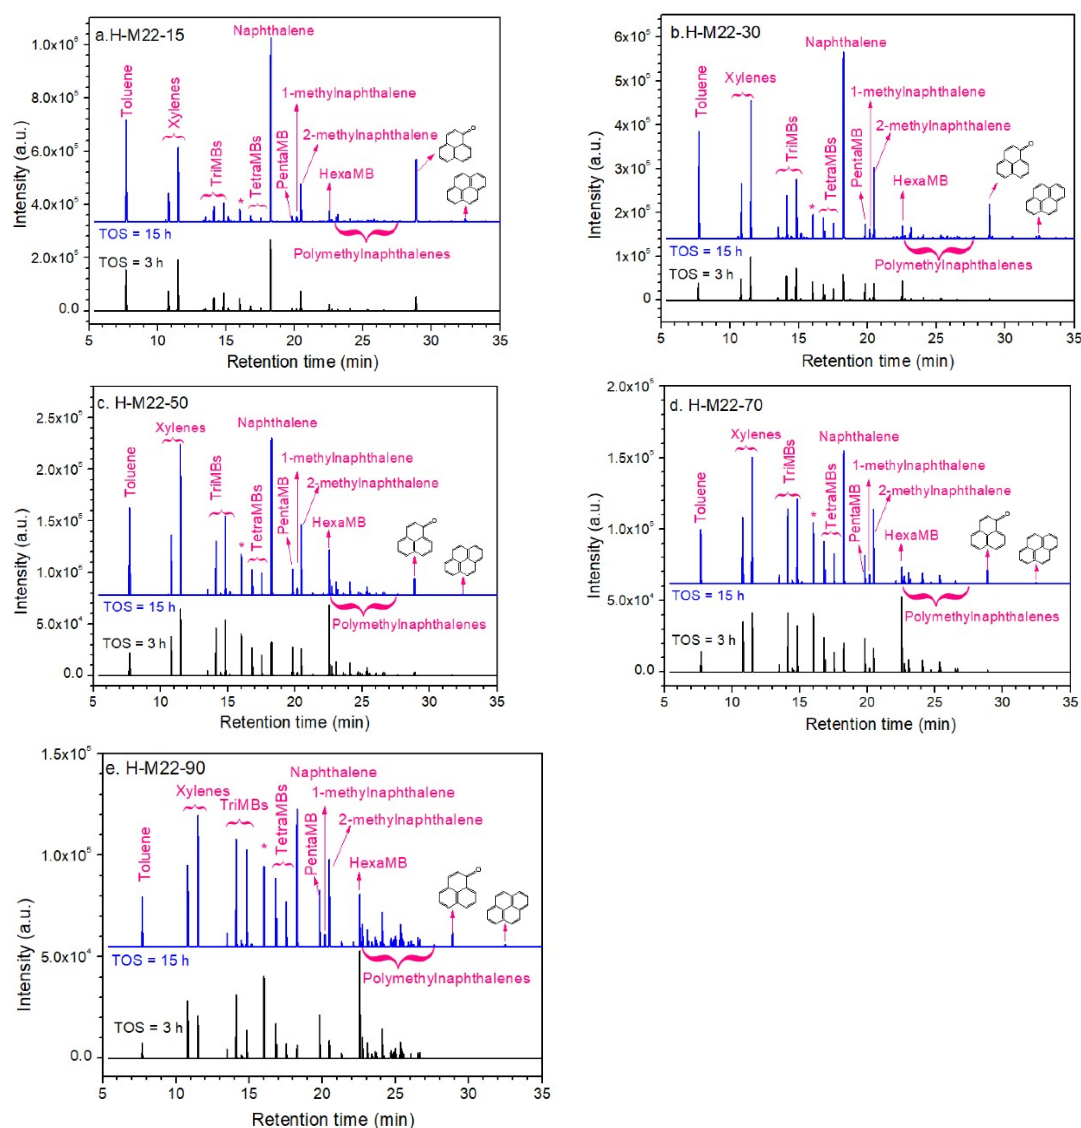

**Figure S7.** GC-MS total ion chromatograms of carbonaceous species retained in H-M22-x zeolites at the time on stream (TOS) of 3 h and 15 h for MTH at 450 °C with a methanol WHSV of 2 h<sup>-1</sup> over (a) H-M22-15; (b) H-M22-30; (c) H-M22-50; (d) H-M22-70 and (e) H-M22-90. The asterisk (\*) represents the internal standard (I.S., hexachloroethane), and each spectra are normalized to I.S. intensity; triMB, tetraMB, pentaMB and hexaMB represent trimethylbenzene, tetramethylbenzene, pentamethylbenzene and hexamethylbenzene, respectively.

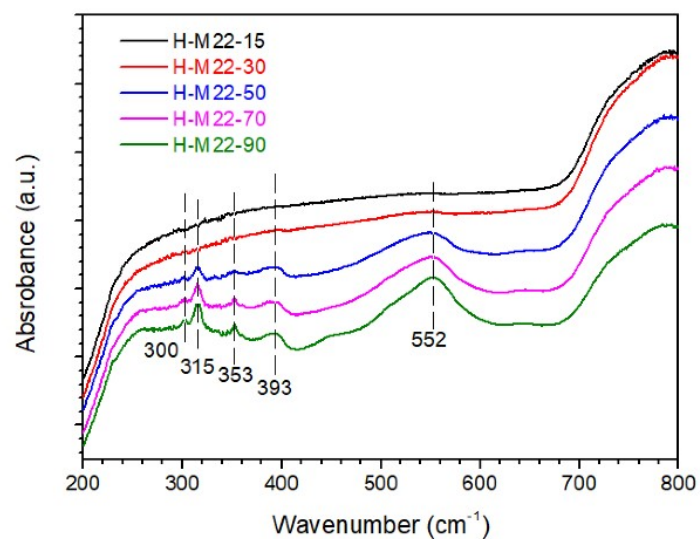

**Figure S8.** UV-vis spectra of completely deactivated (a) H-M22-15; (b) H-M22-30; (c) H-M22-50; (d) H-M22-70 and (e) H-M22-90 zeolites after MTH reactions (as shown in Figure 8).
